# Supplementary material
Source: MDPI journal article supplement (https://www.mdpi.com/2673-401X/3/2/6)

# Stabilized arylzinc iodides in Negishi acylative cross-coupling: a modular synthesis of chalcones

Michele Pierigé, Anna Iuliano, Gaetano Angelici, and Gianluca Casotti\*

Dipartimento di Chimica e Chimica Industriale, Università di Pisa, Via Giuseppe Moruzzi, 13, 56124, Pisa, Italy

Correspondence: gianluca.casotti@dccci.unipi.it

## Table of Contents

|                                                                                |    |
|--------------------------------------------------------------------------------|----|
| (E)-1-(4-methoxyphenyl)-3-phenylprop-2-en-1-one ( <b>3a</b> ).....             | 2  |
| Methyl (E)-4-(3-(2-methoxyphenyl)acryloyl)benzoate ( <b>3b</b> ) .....         | 3  |
| (E)-1-(2-methoxyphenyl)-3-(4-methoxyphenyl)prop-2-en-1-one ( <b>3c</b> ) ..... | 4  |
| (E)-1-(3-chlorophenyl)-3-phenylprop-2-en-1-one ( <b>3d</b> ) .....             | 5  |
| Methyl (E)-4-(3-(naphthalen-1-yl)acryloyl)benzoate ( <b>3e</b> ) .....         | 6  |
| Methyl (E)-4-(3-(thiophen-2-yl)acryloyl)benzoate ( <b>3f</b> ) .....           | 7  |
| (E)-3-(4-chlorophenyl)-1-phenylprop-2-en-1-one ( <b>3g</b> ).....              | 8  |
| (E)-3-phenyl-1-(thiophen-2-yl)prop-2-en-1-one ( <b>3h</b> ) .....              | 9  |
| (E)-3-(4-methoxyphenyl)-1-phenylprop-2-en-1-one ( <b>3i</b> ).....             | 10 |

(E)-1-(4-methoxyphenyl)-3-phenylprop-2-en-1-one (3a)

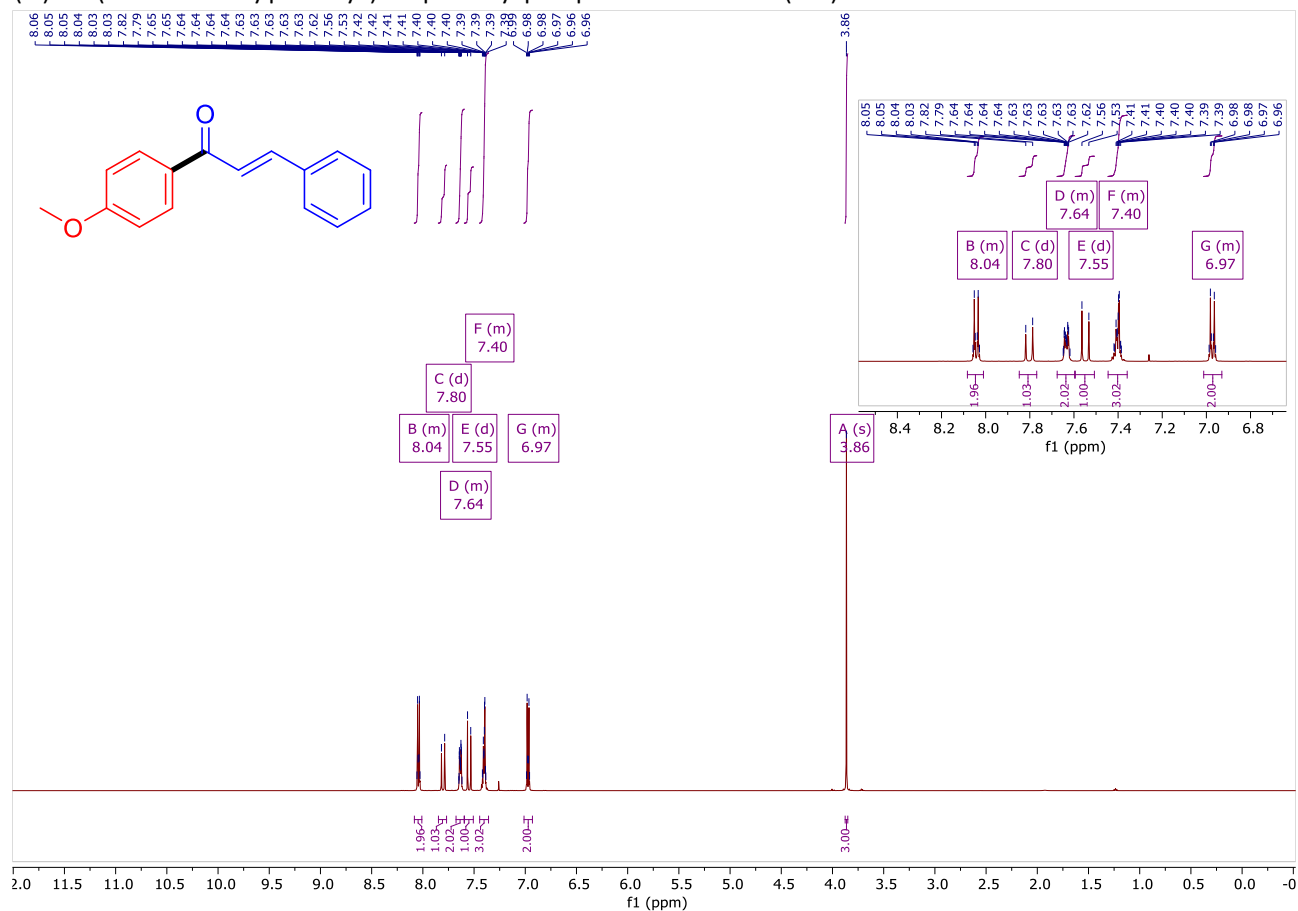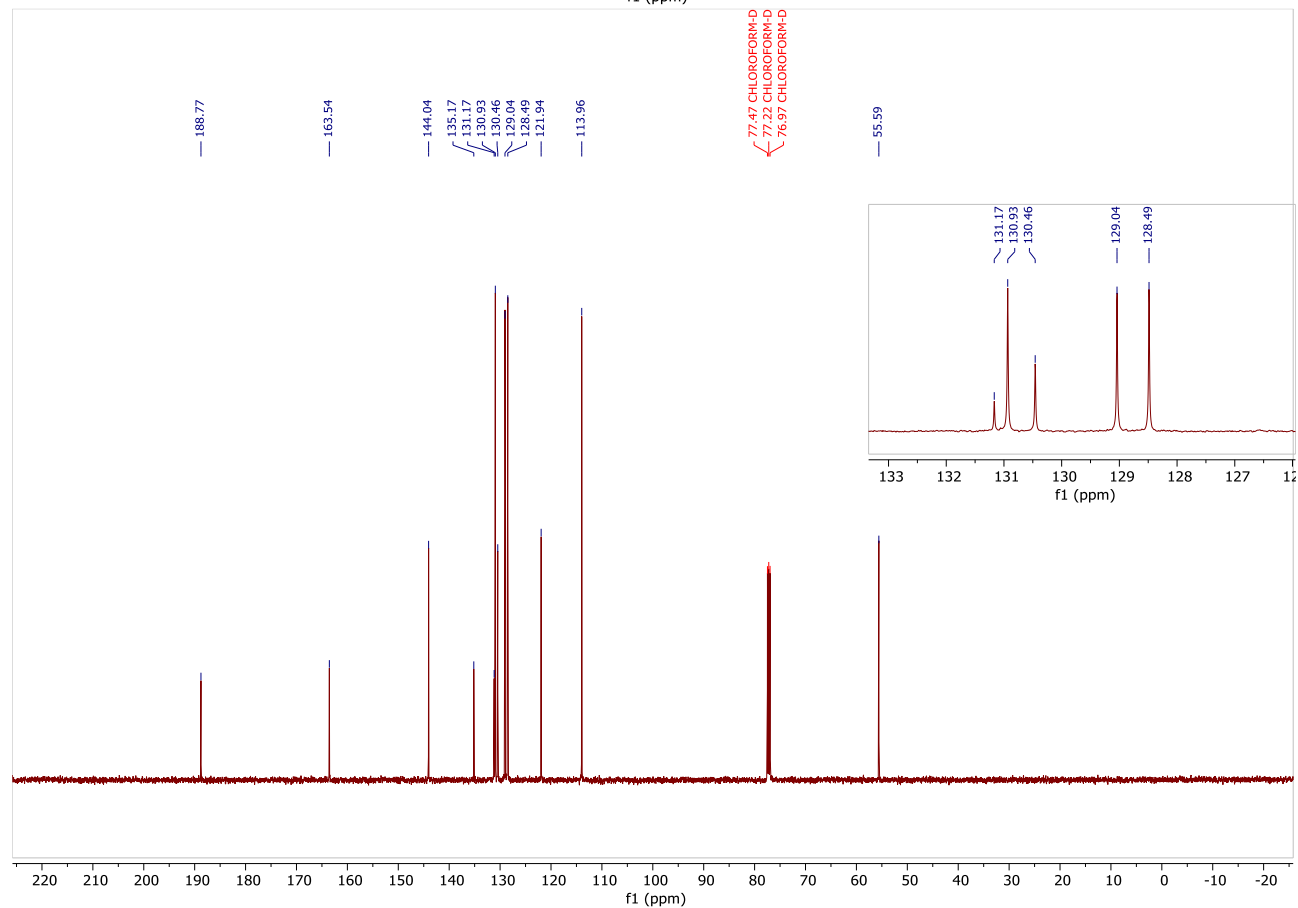

Methyl (E)-4-(3-(2-methoxyphenyl)acryloyl)benzoate (3b)

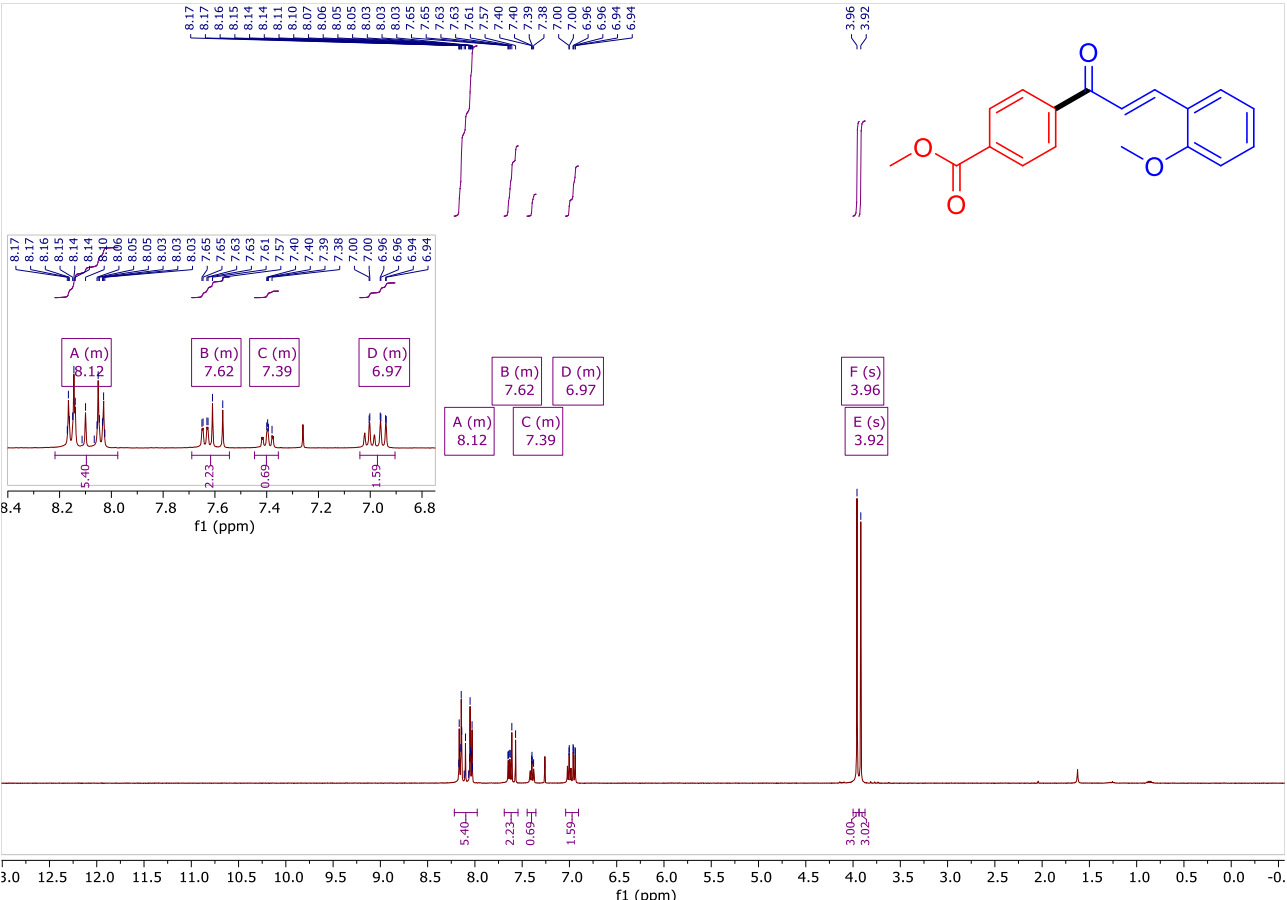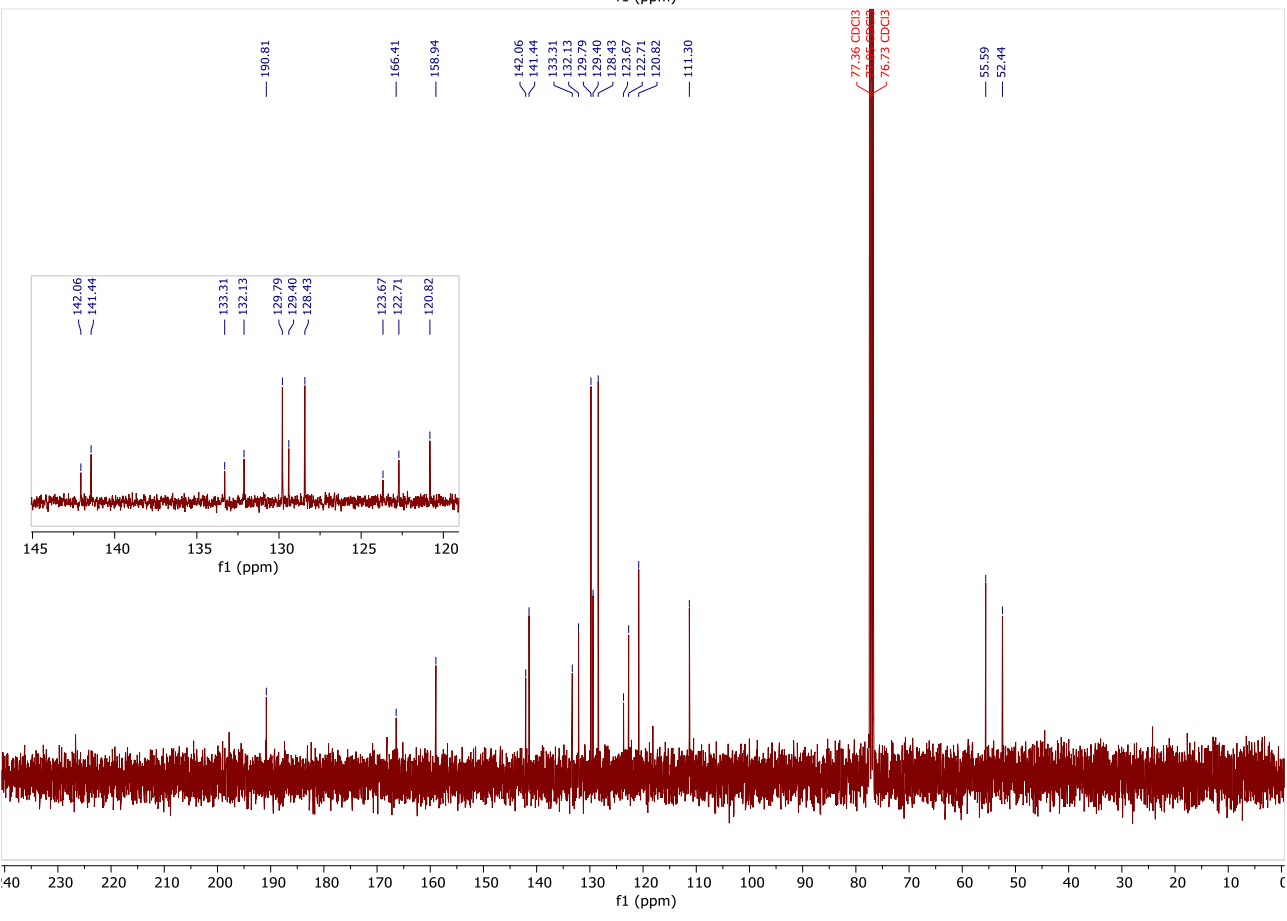

(E)-1-(2-methoxyphenyl)-3-(4-methoxyphenyl)prop-2-en-1-one (3c)

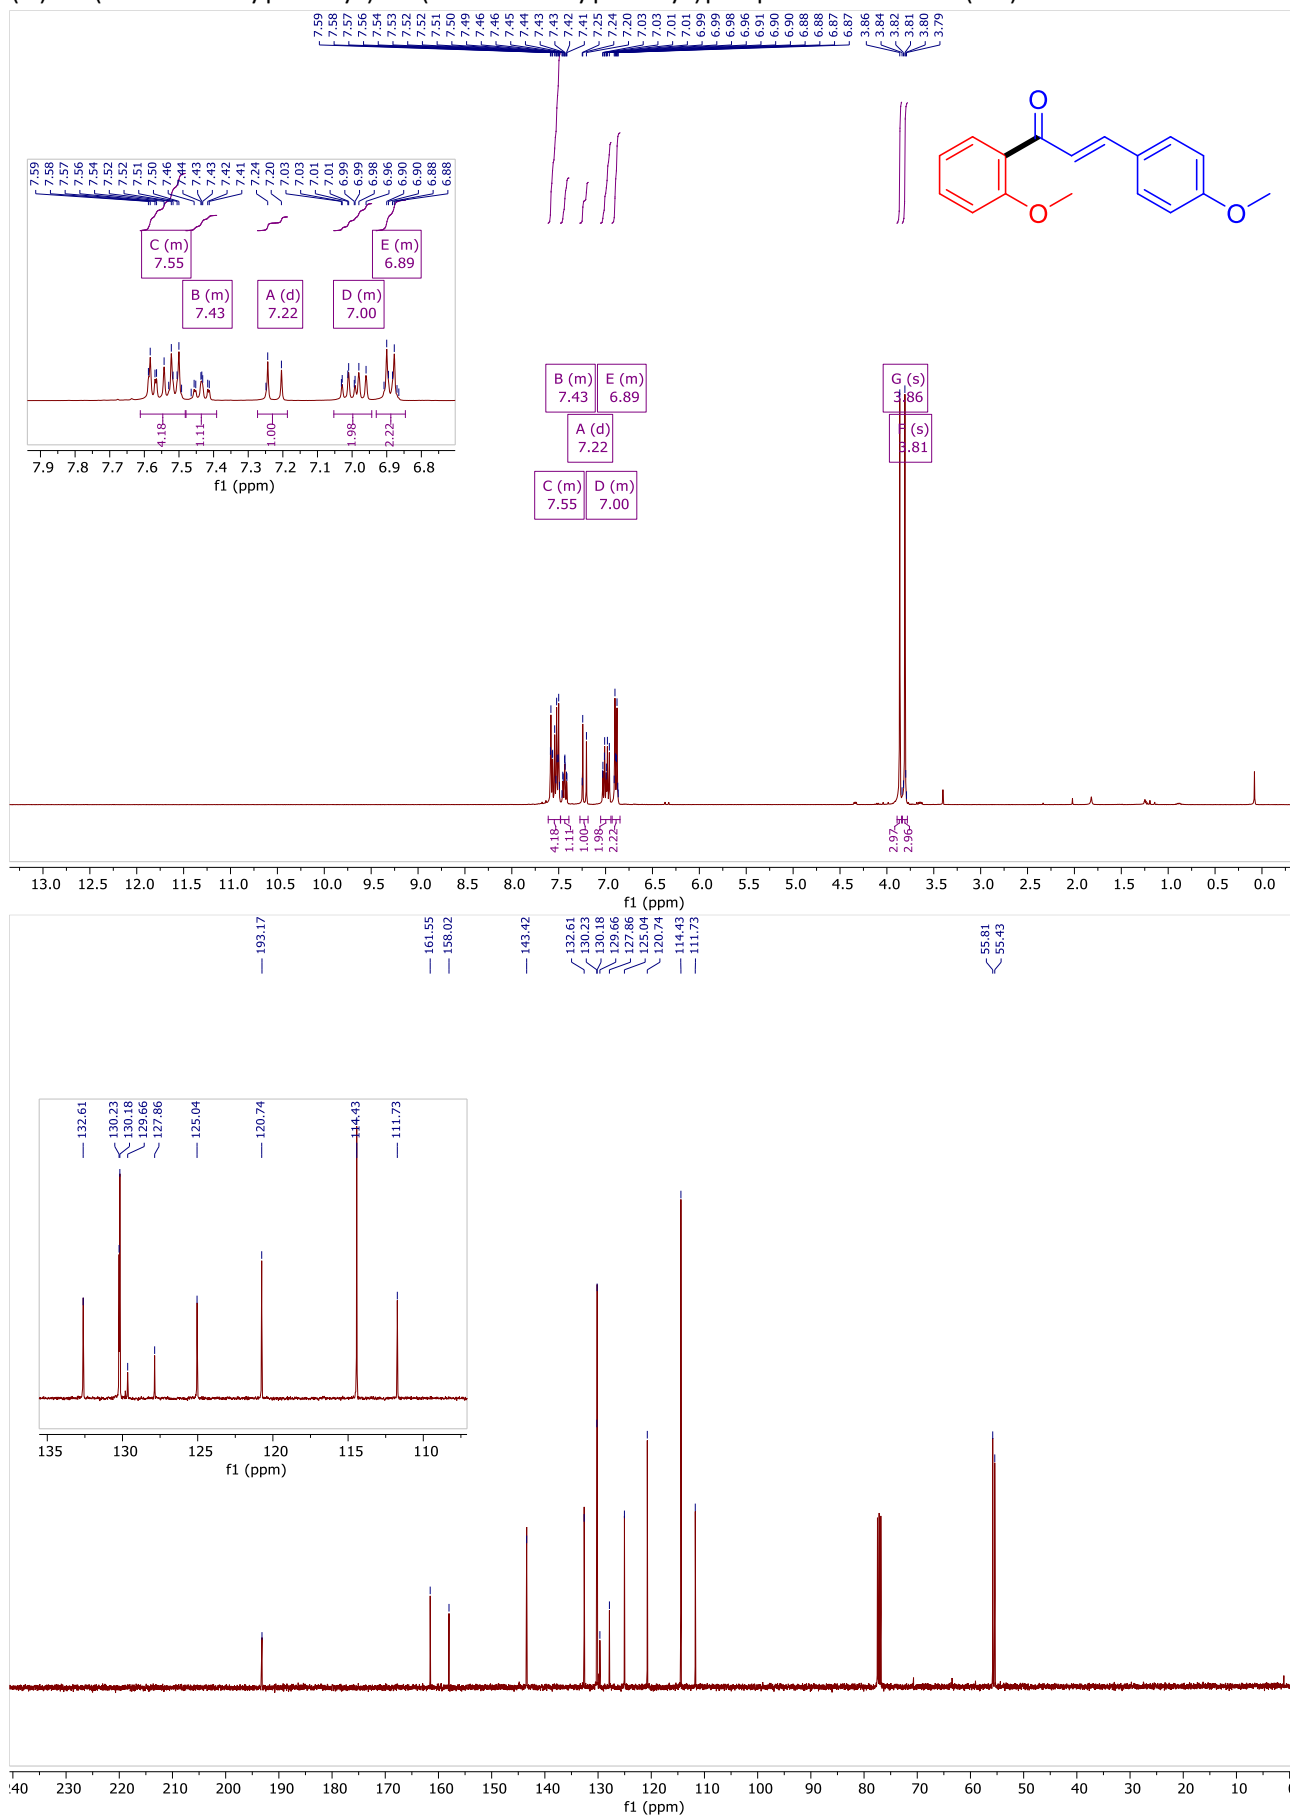

(E)-1-(3-chlorophenyl)-3-phenylprop-2-en-1-one (**3d**)

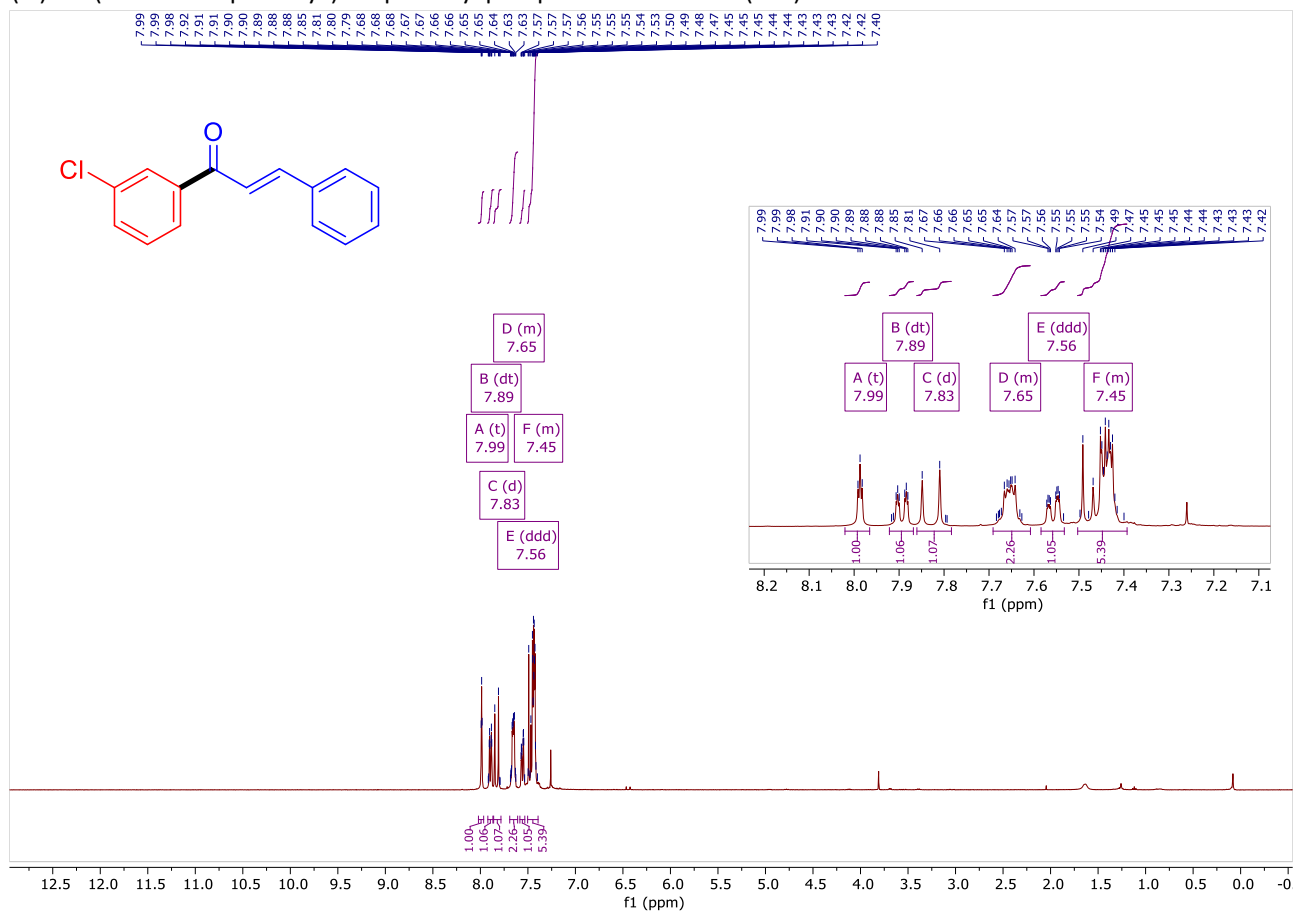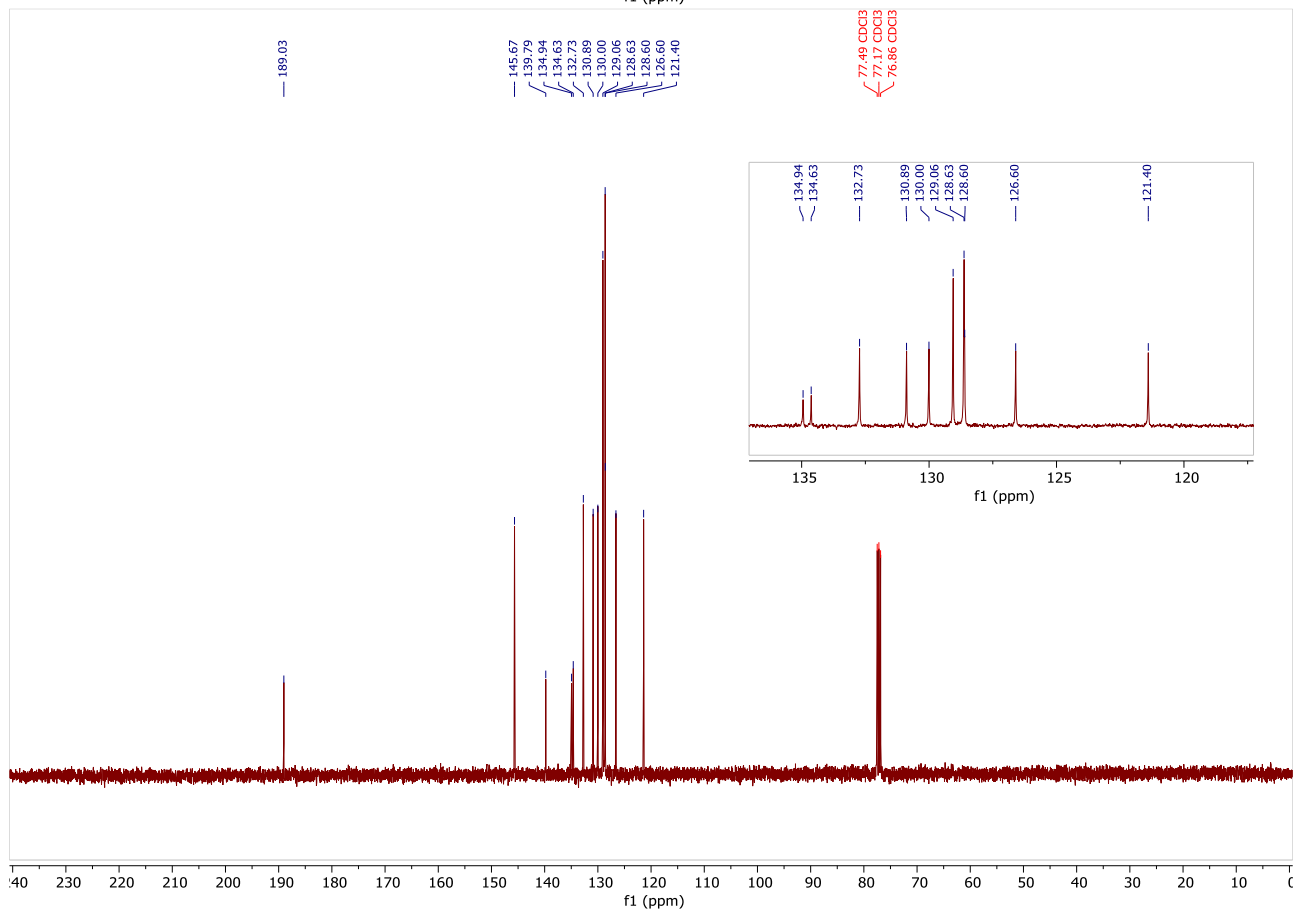

# Methyl (E)-4-(3-(naphthalen-1-yl)acryloyl)benzoate (3e)

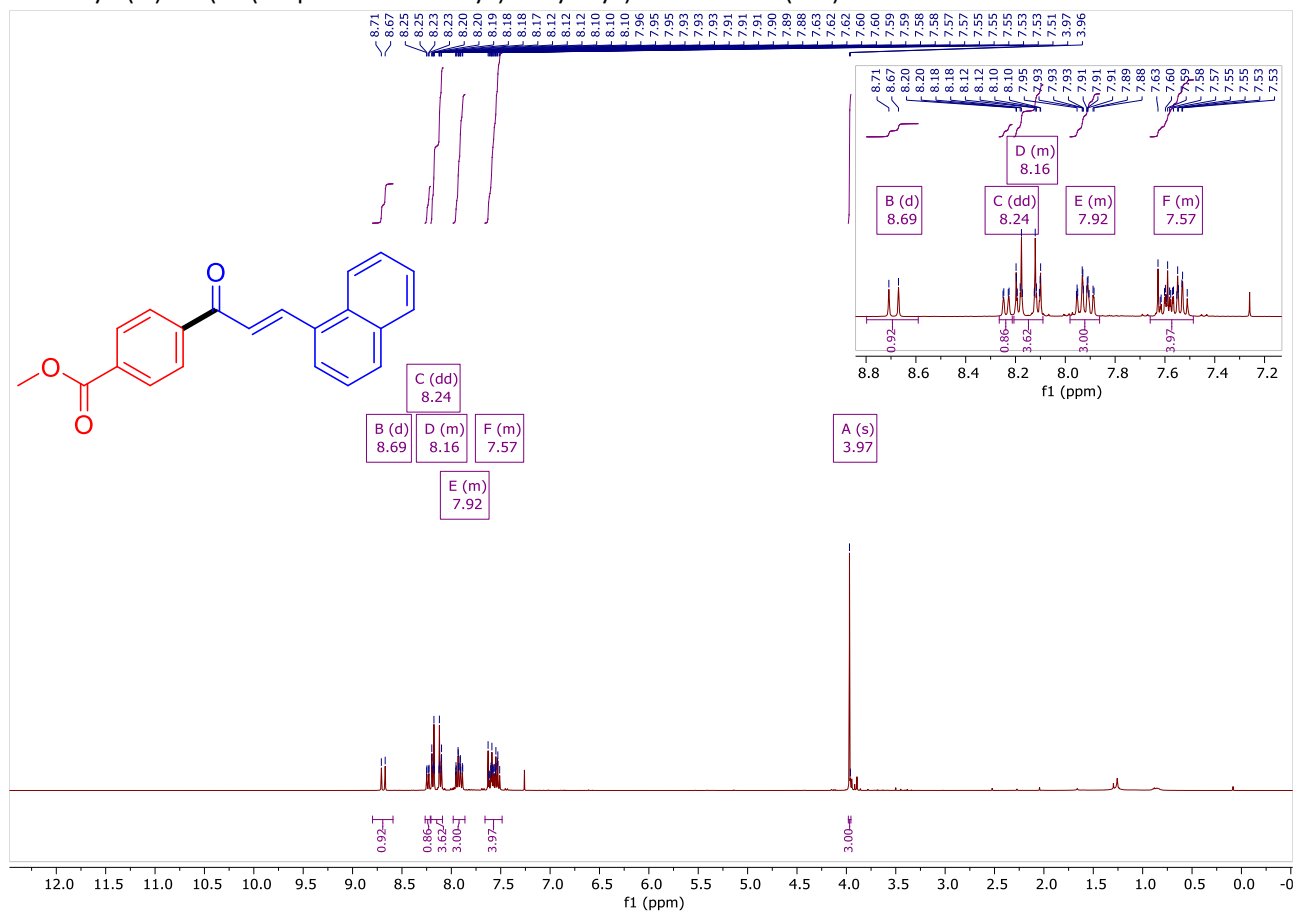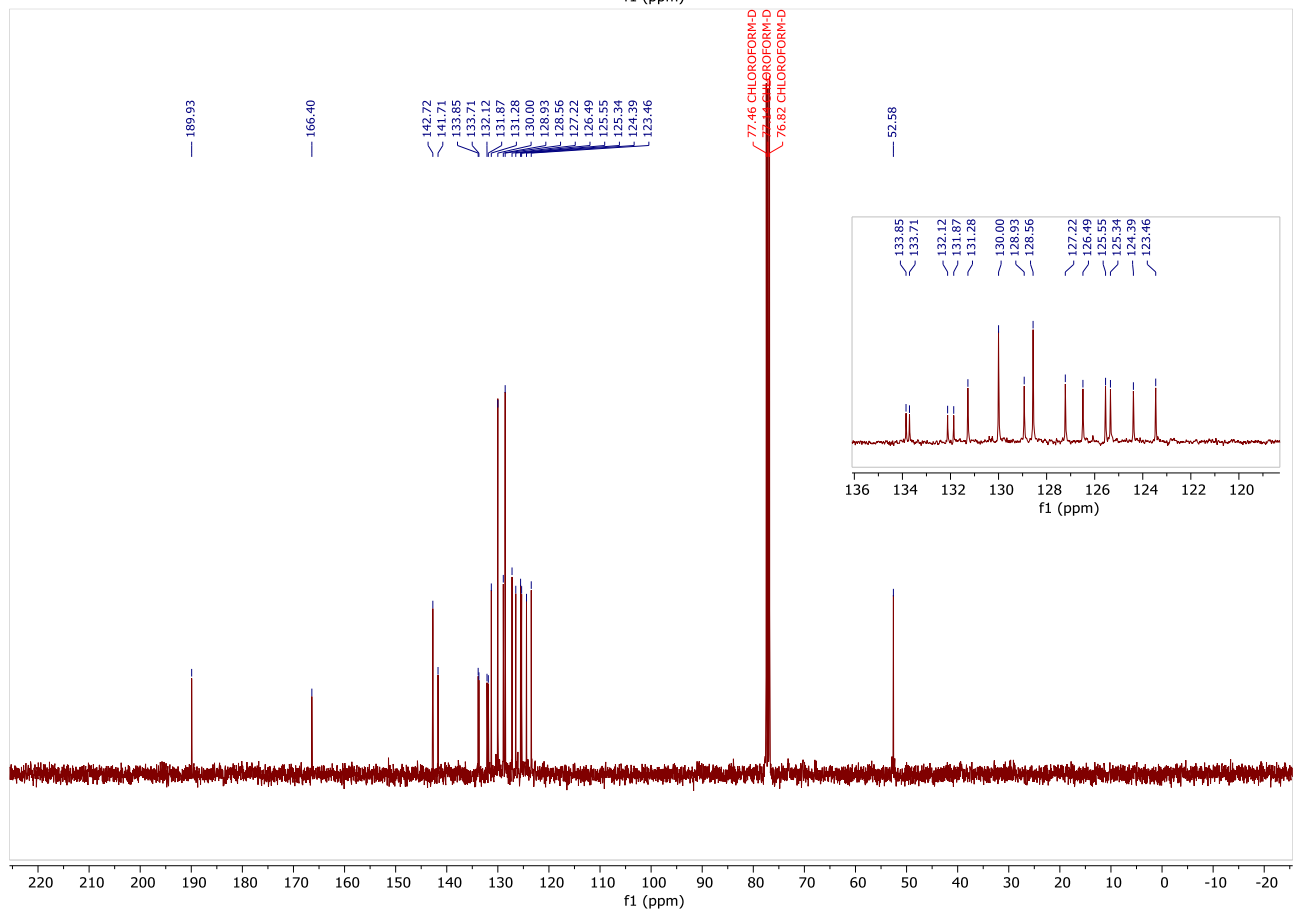

# Methyl (E)-4-(3-(thiophen-2-yl)acryloyl)benzoate (3f)

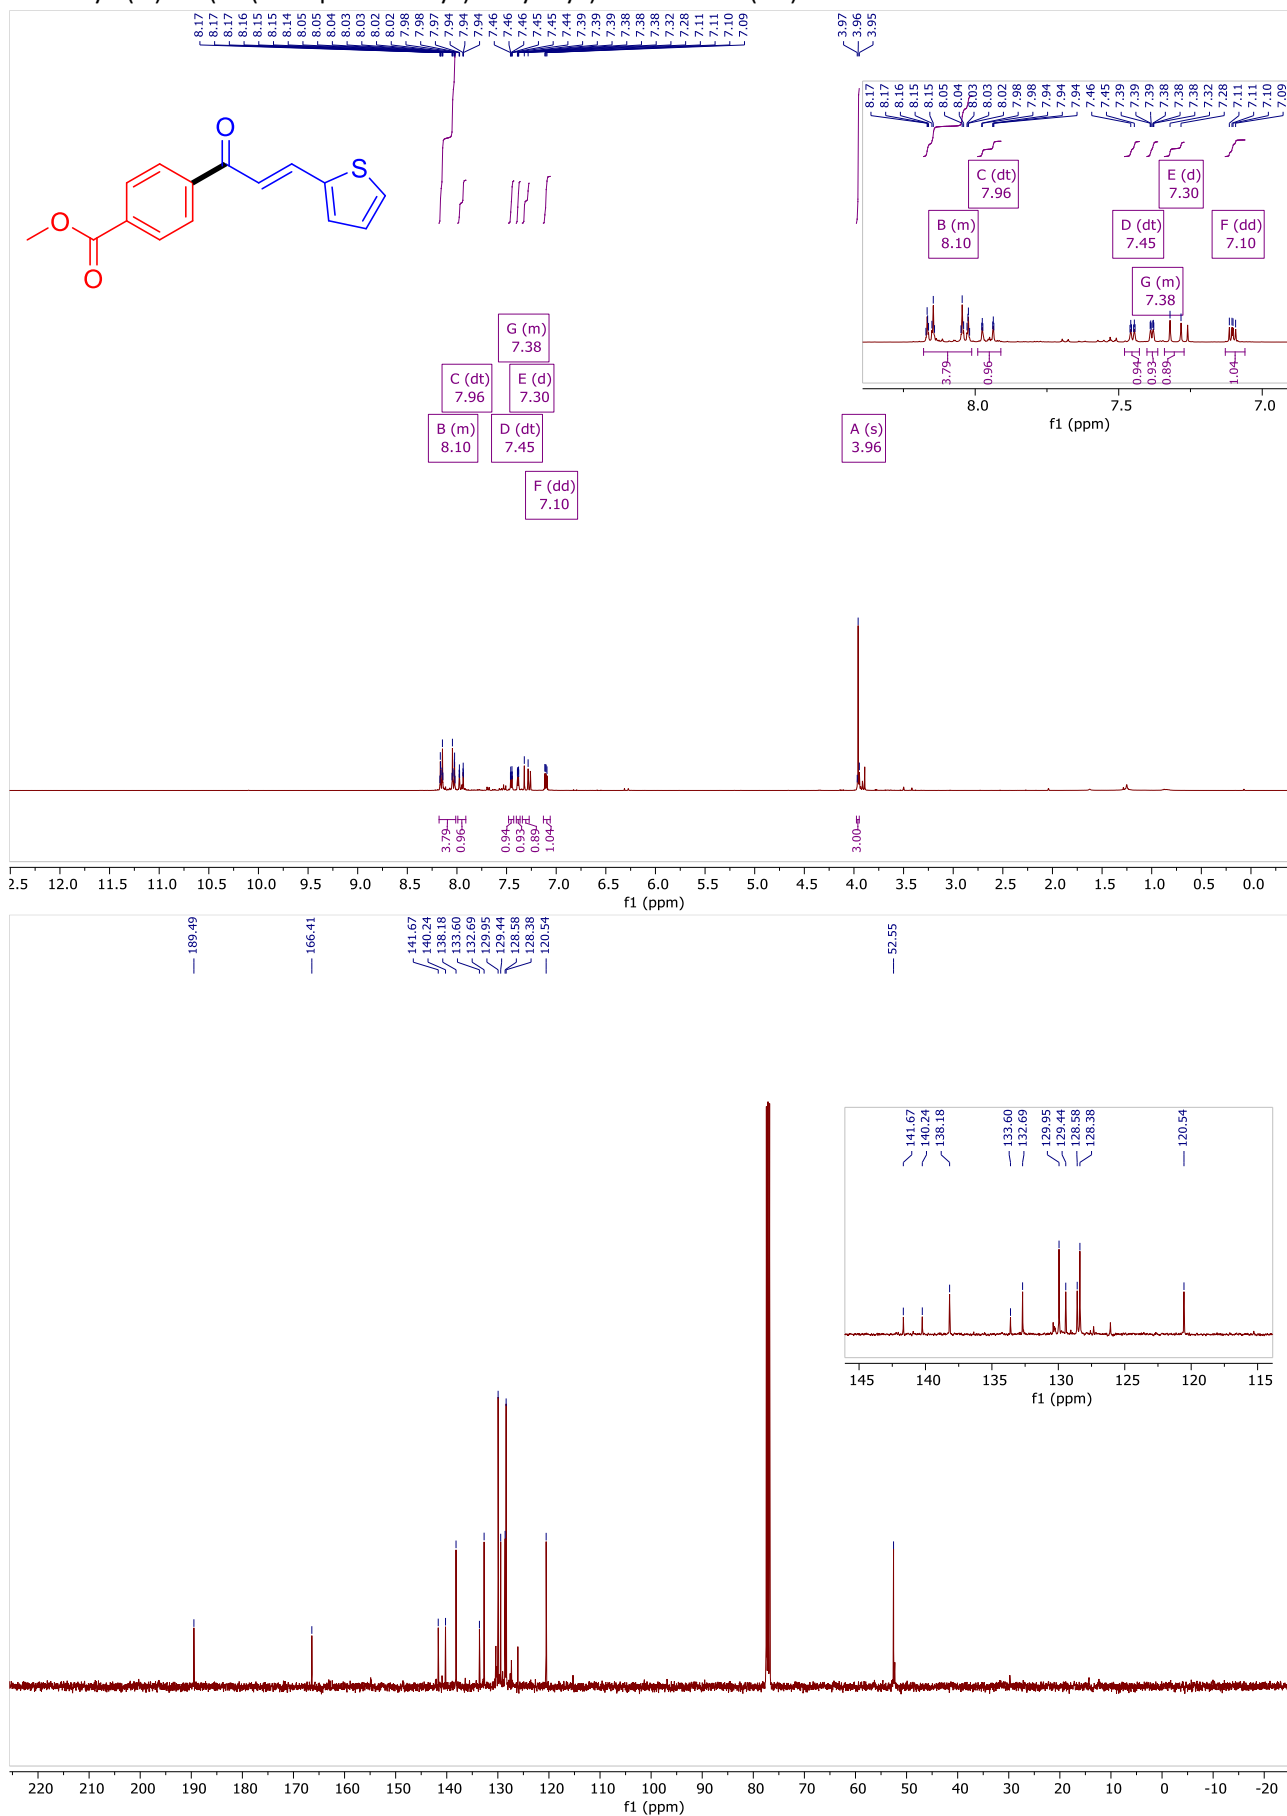

(E)-3-(4-chlorophenyl)-1-phenylprop-2-en-1-one (**3g**)

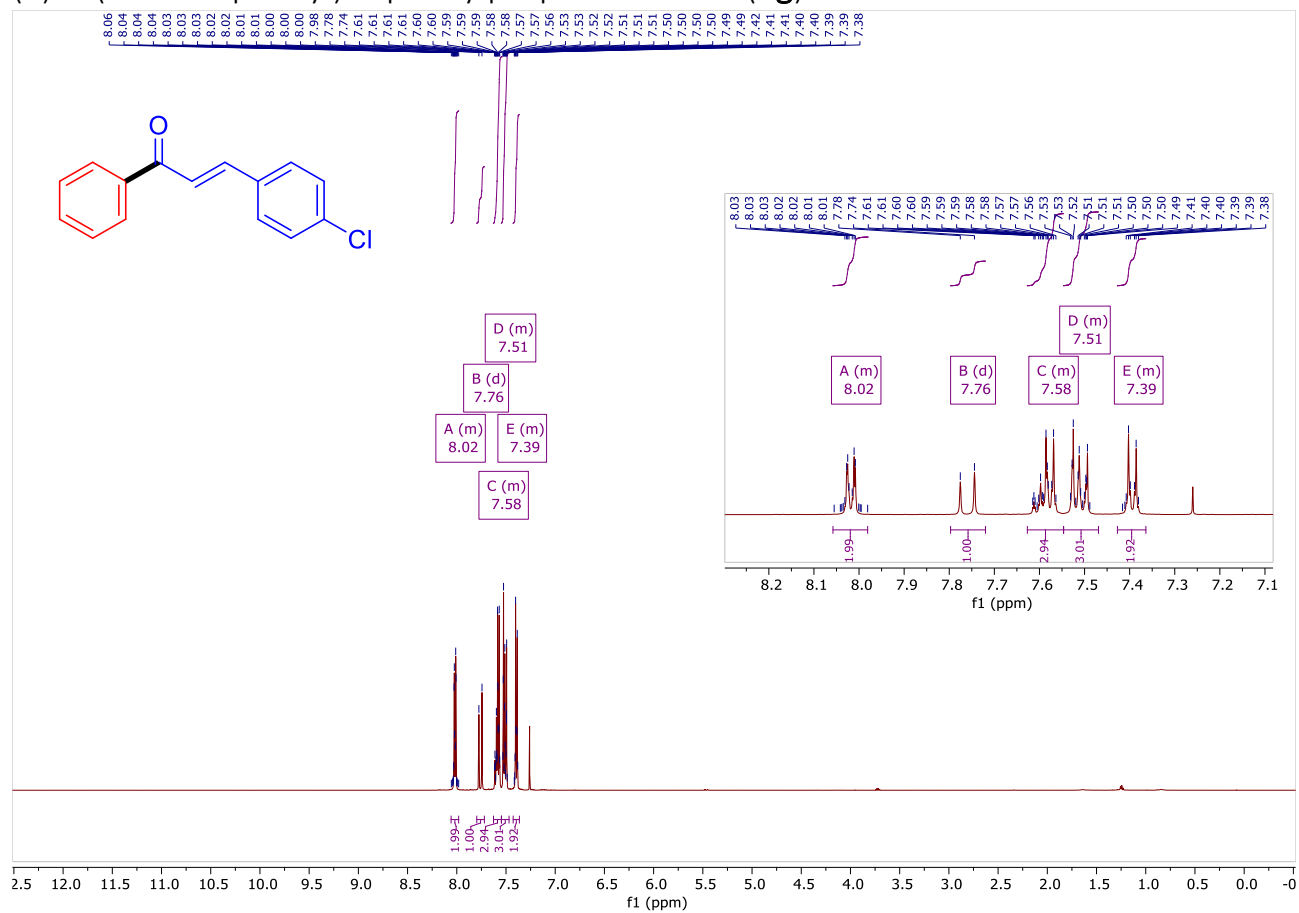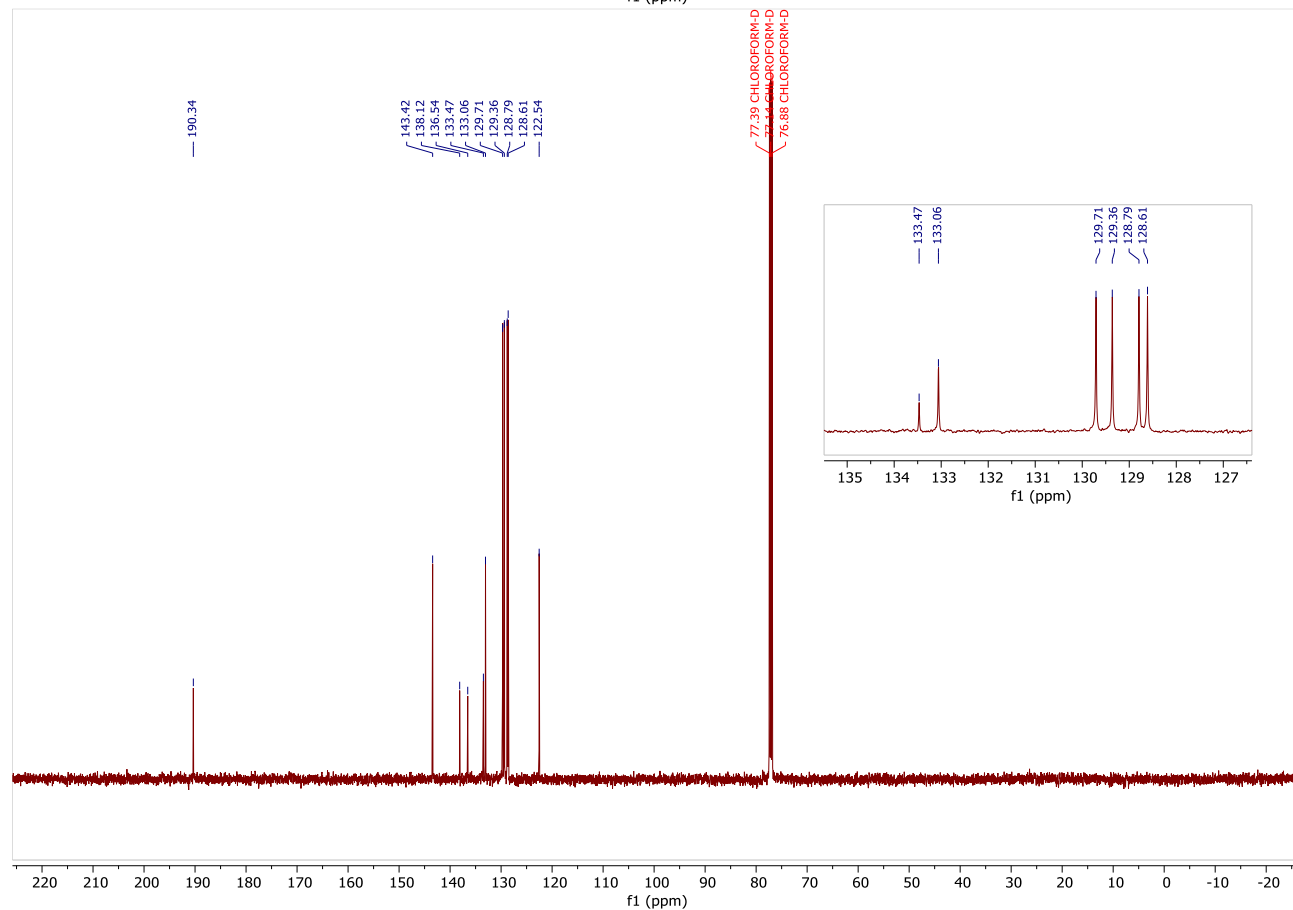



(E)-3-phenyl-1-(thiophen-2-yl)prop-2-en-1-one (3h)

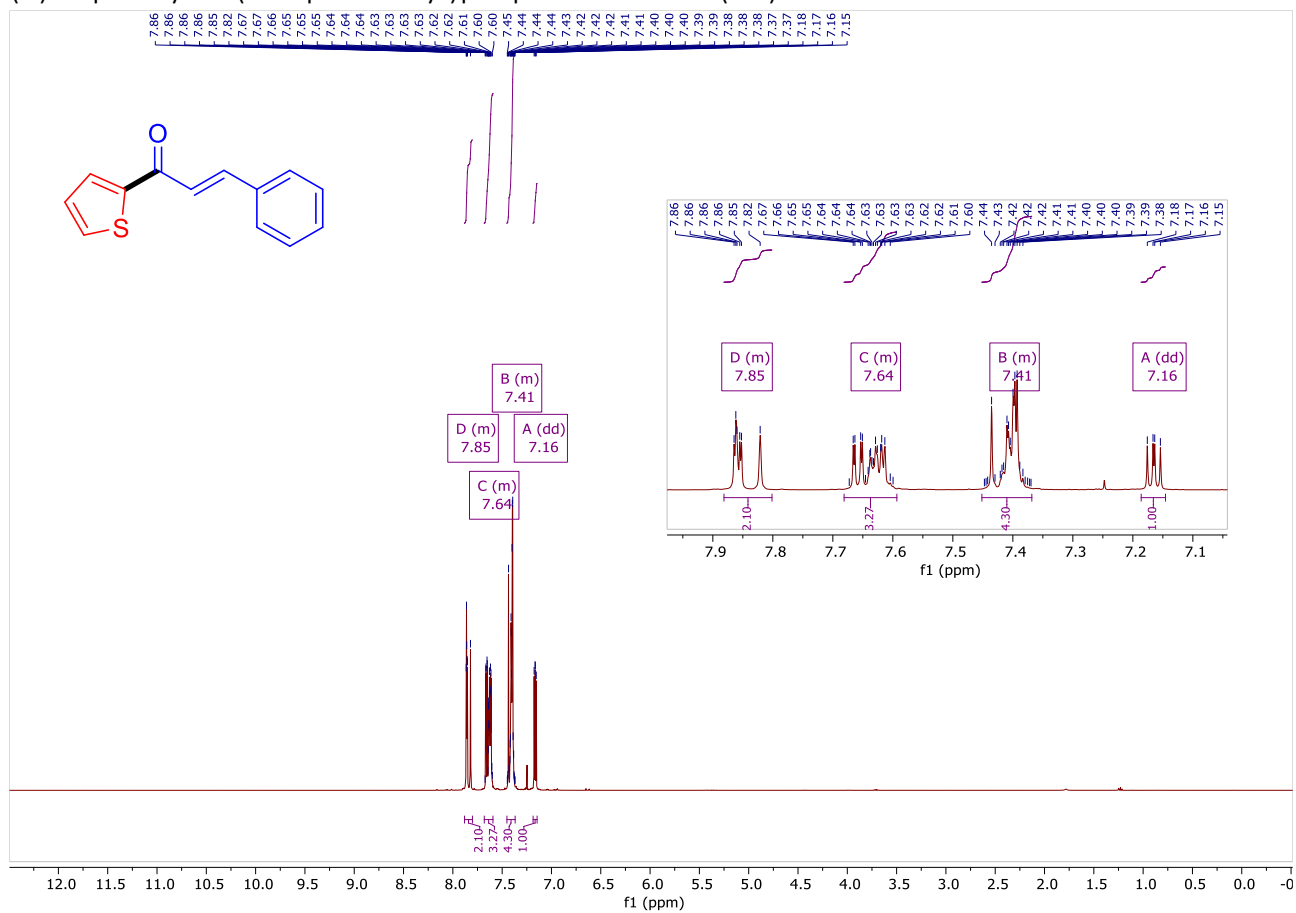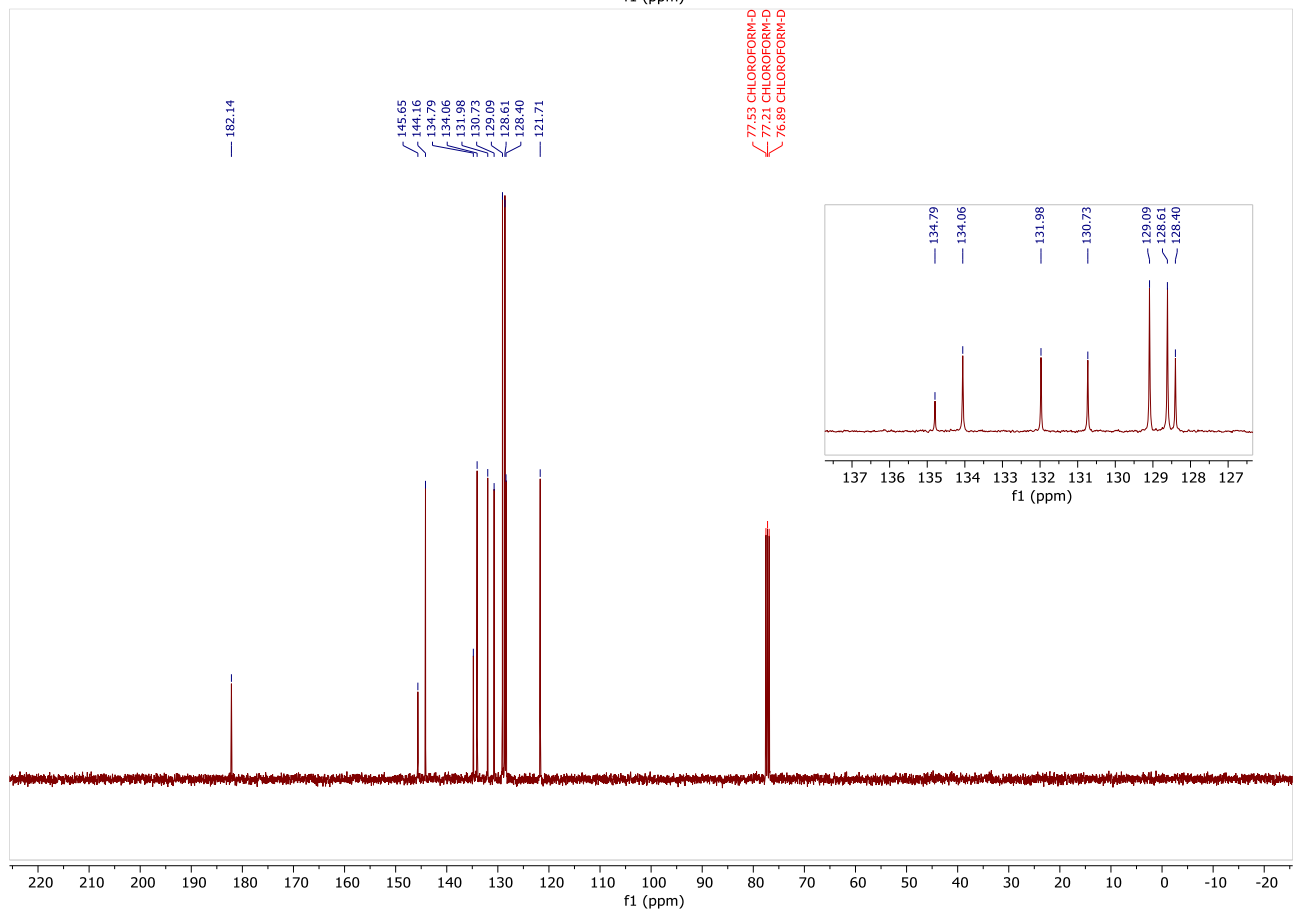

(E)-3-(4-methoxyphenyl)-1-phenylprop-2-en-1-one (3i)

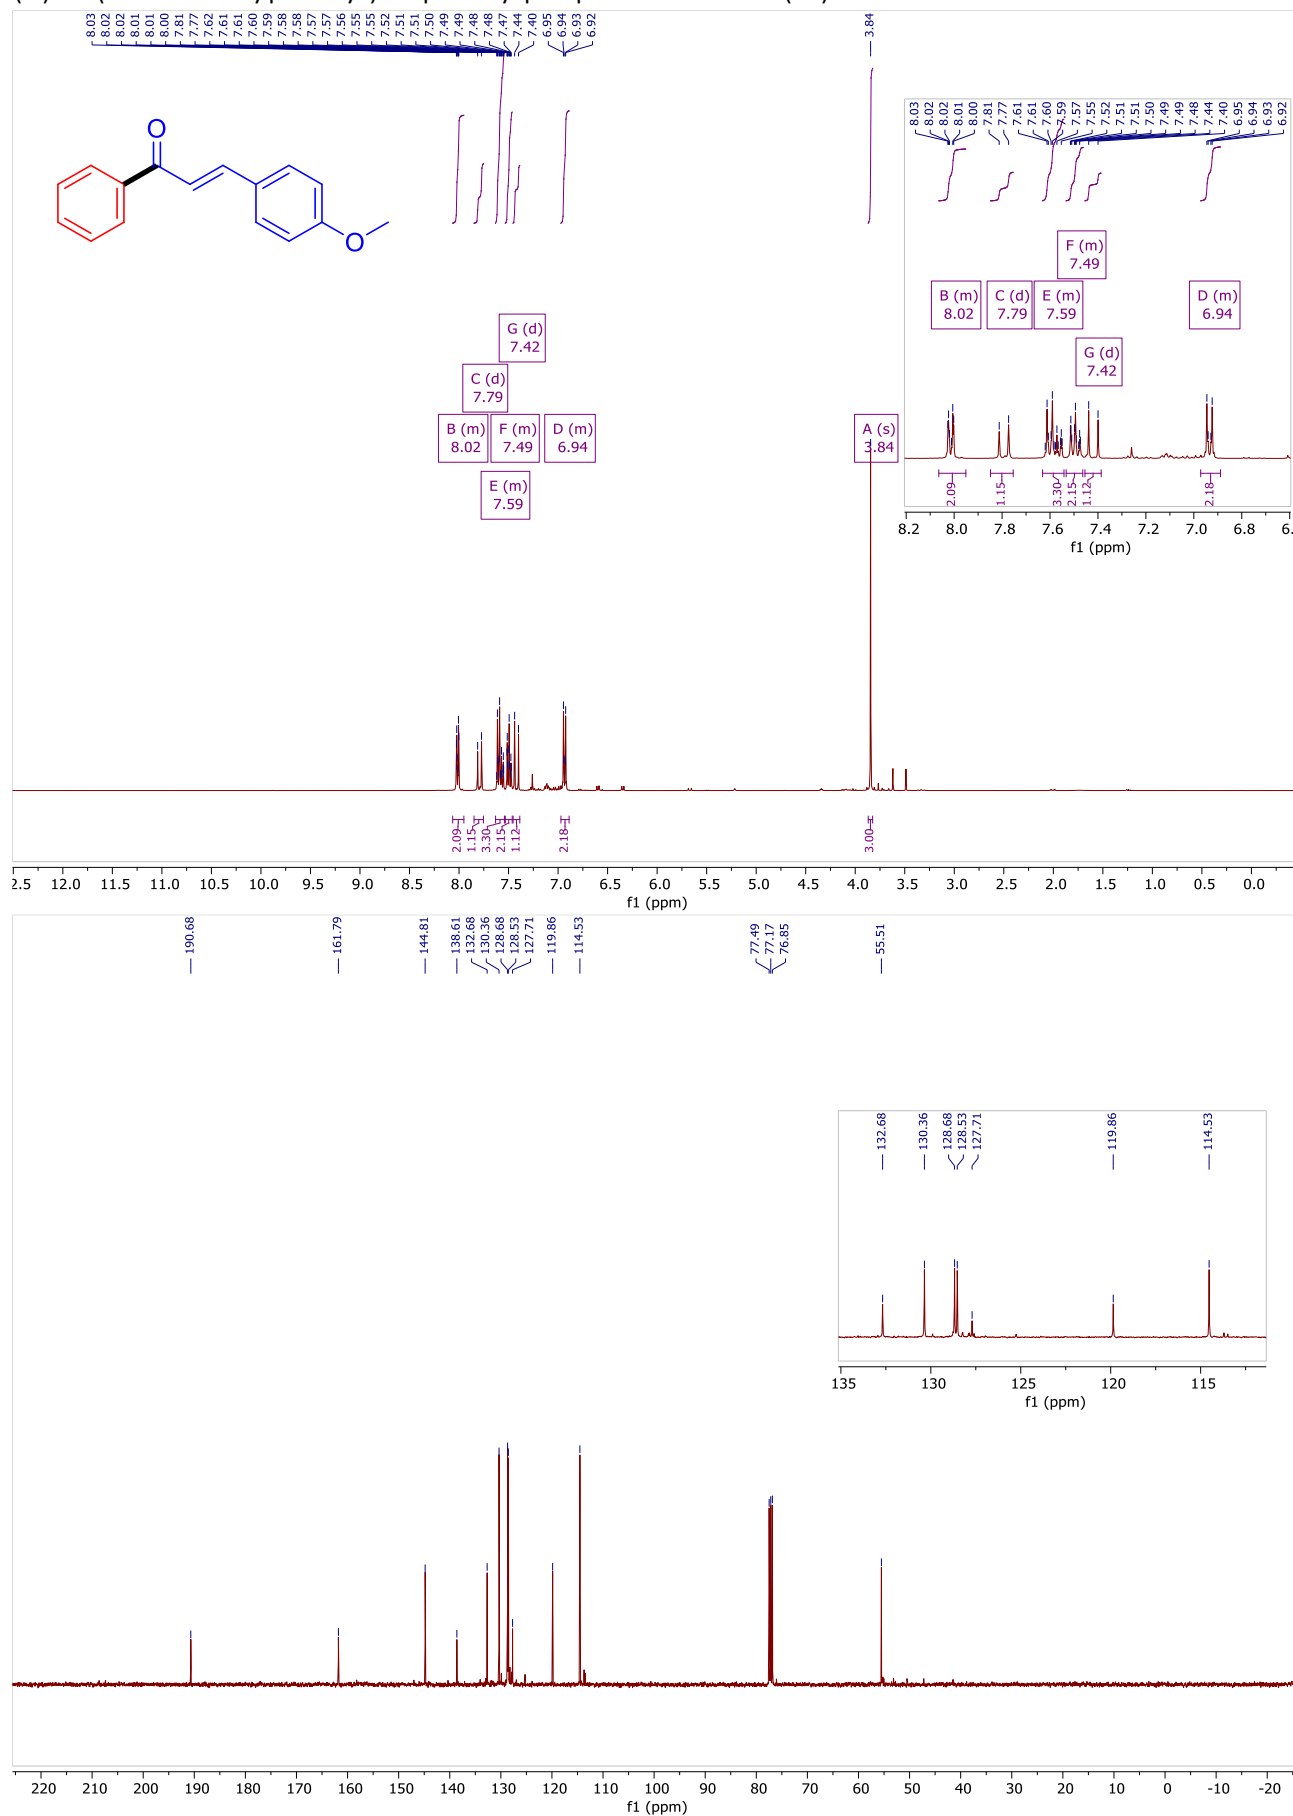

Supplement: s1 [file s1]
